# Supplementary material
Source: PubMed Central journal article supplement (PMC3067566)
Supplement: supp_79_4_1631__1.pdf [file supp_79_4_1631__1.pdf]

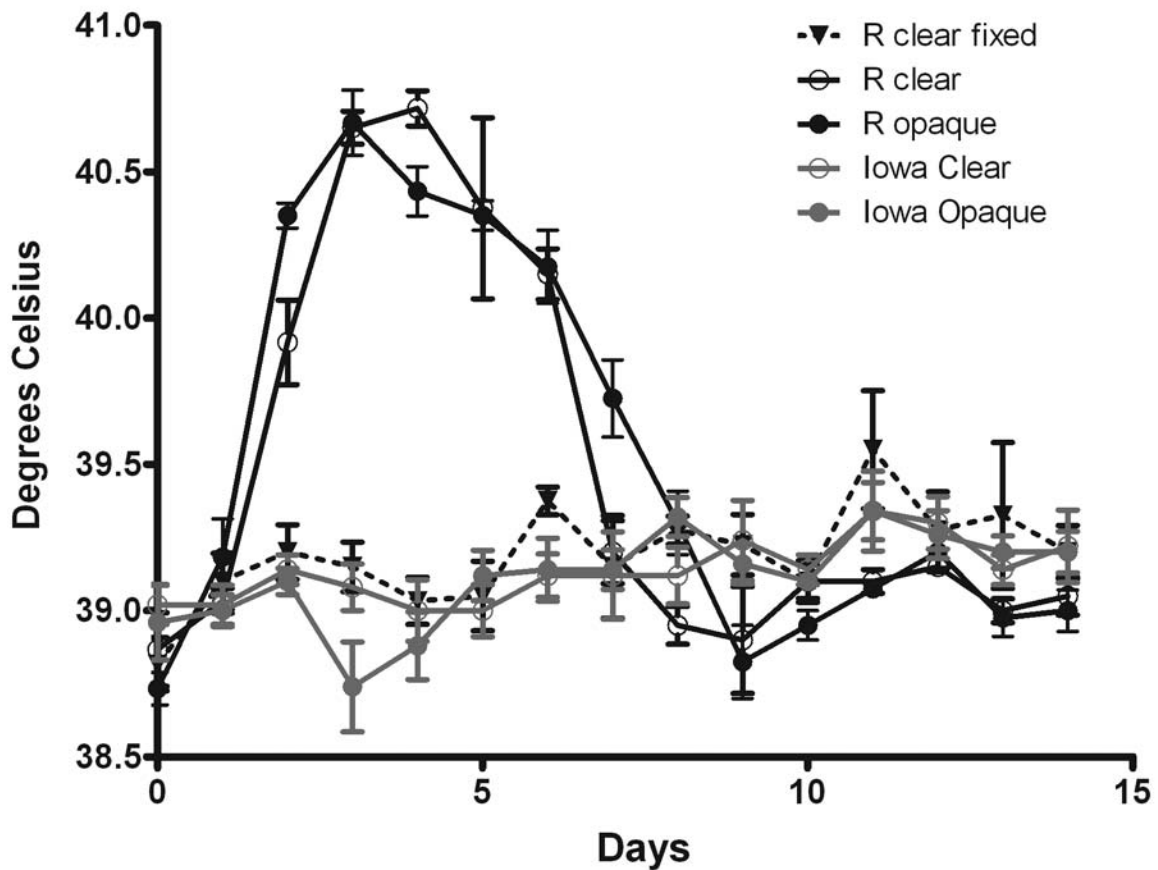

Supplemental Figure 1. Comparison of fever responses of Guinea pigs inoculated intraperitoneally with 1000 PFU of *R. rickettsii* R strain clear and opaque variants; Iowa strain clear and opaque variants; and an equivalent number of paraformaldehyde-fixed *R. rickettsii* R strain clear variant. All animals inoculated with viable organisms showed evidence of infection as demonstrated by seroconversion. Animals inoculated with paraformaldehyde-fixed organisms did not seroconvert (data not shown).
