# Supplementary material
Source: PubMed Central journal article supplement (PMC3067566)
Supplement: supp_79_4_1631__2.pdf [file supp_79_4_1631__2.pdf]

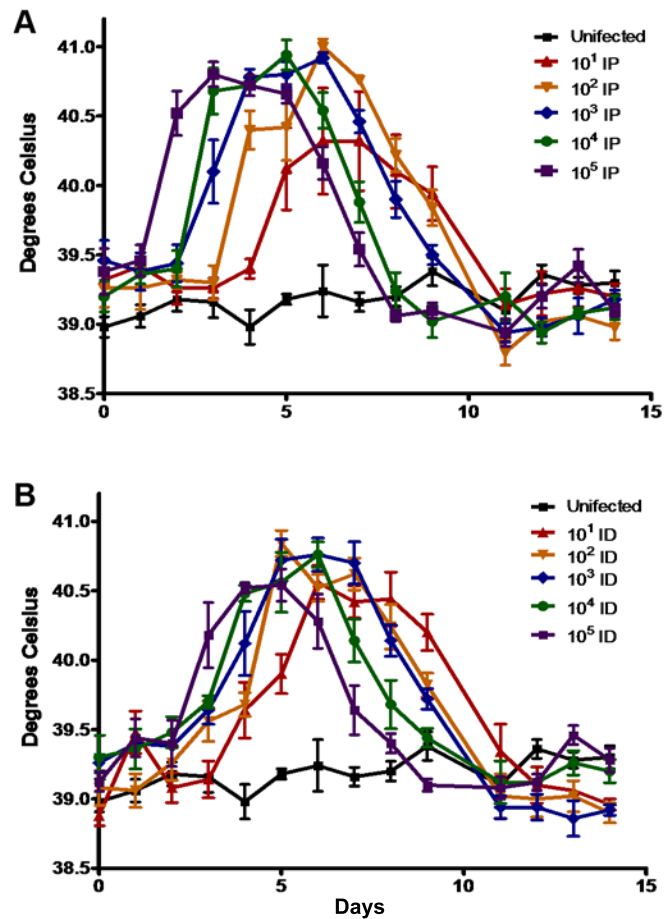

Supplemental Figure 2. Fever curves for *R. rickettsii* R strain clear variant administered either intraperitoneally or intradermally. A) Fever curves for *R. rickettsii* R strain clear variant given IP. B) Fever curves for *R. rickettsii* R strain clear variant given ID. The only observed difference between IP and ID routes of infection was that only 3 out of the 5 guinea pigs administered  $10^1$  PFU IP of *R. rickettsii* clear developed fever, however the magnitude and duration of fever in the 3 guinea pigs that did present with fever was equal in magnitude and duration to that of the other doses. The two animals that did not develop fever also did not seroconvert (data not shown).
